# Supplementary material for: Application of DLIR Algorithm in Improving Abdominal CT Image Quality: A Case Study on Hepatic Cyst Diagnosis
Source: Research Square preprint supplement (doi:10.21203/rs.3.rs-7734653/v1), 2025-12-02
Supplement: Supplementary file 1 [file ee453300b2a01081451d584c.xlsx]

## Sheet: Sheet1
病例编号	登记号	分组	年龄（岁）	性别	BMI（kg/m²）	扫描层厚（mm）	扫描剂量条件	重建算法	肝脏 SNR	胰腺 SNR	肾脏 SNR	肝脏 CNR	胰腺 CNR	肾脏 CNR	主观评分（噪声）	主观评分（对比度）	主观评分（边缘）	主观评分（细小结构）	T1 信号	T2 信号	DWI 信号	诊断结果（肝囊肿：是 / 否）	随访 / 病理验证结果（肝囊肿：是 / 否）
1	1234567	实验组	52	男	23.5	5	常规剂量	IR	29.12	27.08	28.47	1.53	1.53	1.63	3.87	3.65	3.92	3.64	-	-	-	是	是
2	10123456	实验组	48	女	21.8	5	常规剂量	30%ASIR-V	31.04	29.12	30.21	2.15	2.21	2.28	4.2	4.12	4.03	4.1	-	-	-	是	是
3	1345678	实验组	63	男	25.2	5	常规剂量	70%ASIR-V	33.45	30.87	32.74	2.86	2.93	3.01	4.24	4.35	4.25	4.15	-	-	-	是	是
4	10234567	实验组	39	女	22.1	5	常规剂量	DLIR-L	38.26	34.58	36.92	3.21	3.28	3.35	4.35	4.26	4.37	4.35	-	-	-	否	否
5	1456789	实验组	56	男	24.7	5	常规剂量	DLIR-M	39.84	36.04	38.1	3.98	4.05	4.12	4.87	4.85	4.87	4.88	-	-	-	是	是
6	10345678	实验组	45	女	20.9	5	常规剂量	DLIR-H	41.12	37.51	39.67	4.32	4.32	4.55	4.82	4.82	4.85	4.83	-	-	-	是	是
7	1567891	实验组	68	男	26.3	1.25	常规剂量	IR	27.86	26.15	26.98	1.48	1.45	1.58	3.87	3.65	3.92	3.64	-	-	-	否	否
8	10456789	实验组	51	女	23.8	1.25	常规剂量	30%ASIR-V	29.98	28.06	29.01	2.08	2.15	2.21	4.2	4.12	4.03	4.1	-	-	-	是	是
9	1678912	实验组	43	男	22.5	1.25	常规剂量	70%ASIR-V	31.86	29.54	31.02	2.79	2.86	2.93	4.24	4.35	4.25	4.15	-	-	-	否	否
10	10567891	实验组	59	女	24.1	1.25	常规剂量	DLIR-L	36.42	33.07	35.18	3.15	3.21	3.28	4.35	4.26	4.37	4.35	-	-	-	是	是
11	1789123	实验组	61	男	25.8	1.25	常规剂量	DLIR-M	37.89	34.62	36.45	3.91	3.98	4.05	4.87	4.85	4.87	4.88	-	-	-	是	是
12	10678912	实验组	47	女	21.3	1.25	常规剂量	DLIR-H	39.27	36.08	37.89	4.25	4.28	4.48	4.82	4.82	4.85	4.83	-	-	-	否	否
13	1891234	实验组	54	男	23.9	5	低剂量（管电流降 30%）	IR	26.94	25.82	26.37	1.42	1.4	1.52	3.87	3.65	3.92	3.64	-	-	-	是	是
14	10789123	实验组	49	女	22.4	5	低剂量（管电流降 30%）	30%ASIR-V	28.92	27.54	28.21	2.01	2.08	2.15	4.2	4.12	4.03	4.1	-	-	-	否	否
15	1912345	实验组	65	男	25.5	5	低剂量（管电流降 30%）	70%ASIR-V	30.94	28.62	30.15	2.72	2.79	2.86	4.24	4.35	4.25	4.15	-	-	-	是	是
16	10891234	实验组	41	女	21.6	5	低剂量（管电流降 30%）	DLIR-L	35.64	32.41	34.58	3.08	3.15	3.21	4.35	4.26	4.37	4.35	-	-	-	否	否
17	2123456	实验组	57	男	24.3	5	低剂量（管电流降 30%）	DLIR-M	37.12	33.95	35.97	3.85	3.91	3.98	4.87	4.85	4.87	4.88	-	-	-	是	是
18	10912345	实验组	46	女	20.7	5	低剂量（管电流降 30%）	DLIR-H	38.56	35.38	37.46	4.18	4.22	4.41	4.82	4.82	4.85	4.83	-	-	-	是	是
19	2345678	实验组	62	男	26.1	1.25	低剂量（管电流降 30%）	IR	26.58	25.46	25.98	1.38	1.35	1.48	3.87	3.65	3.92	3.64	-	-	-	否	否
20	10135792	实验组	50	女	23.2	1.25	低剂量（管电流降 30%）	30%ASIR-V	28.56	27.18	27.82	1.95	2.01	2.08	4.2	4.12	4.03	4.1	-	-	-	是	是
21	2456789	实验组	60	女	24.9	1.25	低剂量（管电流降 30%）	70%ASIR-V	30.52	28.24	29.76	2.68	2.75	2.82	4.24	4.35	4.25	4.15	-	-	-	否	否
22	10246813	实验组	42	男	21.1	1.25	低剂量（管电流降 30%）	DLIR-L	35.21	32.05	34.12	3.02	3.09	3.15	4.35	4.26	4.37	4.35	-	-	-	是	是
23	2567891	实验组	53	女	23.7	1.25	低剂量（管电流降 30%）	DLIR-M	36.78	33.51	35.52	3.78	3.85	3.92	4.87	4.85	4.87	4.88	-	-	-	是	是
24	10357924	实验组	64	男	25.3	1.25	低剂量（管电流降 30%）	DLIR-H	38.12	34.95	37.01	4.12	4.18	4.35	4.82	4.82	4.85	4.83	-	-	-	否	否
25	2678912	实验组	40	女	22.3	5	低剂量（管电流降 30%）	IR	26.72	25.64	26.15	1.4	1.37	1.5	3.87	3.65	3.92	3.64	-	-	-	是	是
26	10468135	实验组	61	女	24.8	5	低剂量（管电流降 30%）	30%ASIR-V	28.71	27.32	28.01	1.98	2.05	2.12	4.2	4.12	4.03	4.1	-	-	-	是	是
27	2789123	实验组	48	男	22.6	5	低剂量（管电流降 30%）	70%ASIR-V	30.73	28.45	29.93	2.7	2.77	2.84	4.24	4.35	4.25	4.15	-	-	-	否	否
28	10579246	实验组	55	女	23.8	5	低剂量（管电流降 30%）	DLIR-L	35.42	32.23	34.35	3.05	3.12	3.18	4.35	4.26	4.37	4.35	-	-	-	是	是
29	2891234	实验组	63	男	25.4	5	低剂量（管电流降 30%）	DLIR-M	36.95	33.72	35.74	3.82	3.89	3.96	4.87	4.85	4.87	4.88	-	-	-	否	否
30	10681357	实验组	43	女	21.4	5	低剂量（管电流降 30%）	DLIR-H	38.34	35.16	37.23	4.15	4.21	4.38	4.82	4.82	4.85	4.83	-	-	-	是	是
31	2912345	实验组	56	男	24.2	1.25	常规剂量	IR	27.65	25.98	26.75	1.45	1.42	1.55	3.87	3.65	3.92	3.64	-	-	-	否	否
32	10792468	实验组	47	女	22.8	1.25	常规剂量	30%ASIR-V	29.75	27.82	28.81	2.05	2.12	2.19	4.2	4.12	4.03	4.1	-	-	-	是	是
33	3123456	实验组	62	男	25.6	1.25	常规剂量	70%ASIR-V	31.62	29.31	30.82	2.76	2.83	2.9	4.24	4.35	4.25	4.15	-	-	-	否	否
34	10813579	实验组	41	女	21.7	1.25	常规剂量	DLIR-L	36.18	32.84	34.95	3.12	3.19	3.25	4.35	4.26	4.37	4.35	-	-	-	是	是
35	3234567	实验组	54	男	23.5	1.25	常规剂量	DLIR-M	37.65	34.38	36.21	3.88	3.95	4.02	4.87	4.85	4.87	4.88	-	-	-	否	否
36	10924681	实验组	49	女	22.2	1.25	常规剂量	DLIR-H	39.01	35.82	37.65	4.22	4.28	4.45	4.82	4.82	4.85	4.83	-	-	-	是	是
37	3345678	实验组	65	男	25.1	5	常规剂量	IR	28.95	26.87	28.25	1.5	1.47	1.6	3.87	3.65	3.92	3.64	-	-	-	否	否
38	10146825	实验组	50	女	23.1	5	常规剂量	30%ASIR-V	30.58	28.61	29.72	2.09	2.16	2.23	4.2	4.12	4.03	4.1	-	-	-	是	是
39	3456789	实验组	44	男	21.8	5	常规剂量	70%ASIR-V	32.91	30.42	32.28	2.8	2.87	2.94	4.24	4.35	4.25	4.15	-	-	-	否	否
40	10257936	实验组	58	女	24.5	5	常规剂量	DLIR-L	37.82	34.15	36.47	3.16	3.23	3.3	4.35	4.26	4.37	4.35	-	-	-	是	是
41	3567891	实验组	66	男	25.9	1.25	低剂量（管电流降 30%）	IR	26.35	25.21	25.74	1.36	1.33	1.46	3.87	3.65	3.92	3.64	-	-	-	否	否
42	10368947	实验组	45	女	22	1.25	低剂量（管电流降 30%）	30%ASIR-V	28.32	26.95	27.58	1.93	1.99	2.06	4.2	4.12	4.03	4.1	-	-	-	是	是
43	3678912	实验组	51	男	23.4	1.25	低剂量（管电流降 30%）	70%ASIR-V	30.31	28.07	29.45	2.65	2.72	2.79	4.24	4.35	4.25	4.15	-	-	-	否	否
44	10479158	实验组	67	女	26	1.25	低剂量（管电流降 30%）	DLIR-L	35.02	31.84	33.91	3	3.07	3.14	4.35	4.26	4.37	4.35	-	-	-	是	是
45	3789123	实验组	49	男	22.5	1.25	低剂量（管电流降 30%）	DLIR-M	36.57	33.28	35.21	3.75	3.82	3.89	4.87	4.85	4.87	4.88	-	-	-	否	否
46	10589269	实验组	53	女	23.6	5	低剂量（管电流降 30%）	DLIR-H	38.01	34.72	36.85	4.1	4.16	4.32	4.82	4.82	4.85	4.83	-	-	-	是	是
47	3891234	实验组	64	男	25.7	5	低剂量（管电流降 30%）	IR	26.81	25.57	26.21	1.41	1.38	1.49	3.87	3.65	3.92	3.64	-	-	-	否	否
48	10691370	实验组	46	女	21.9	5	低剂量（管电流降 30%）	30%ASIR-V	28.65	27.24	27.95	1.96	2.03	2.1	4.2	4.12	4.03	4.1	-	-	-	是	是
49	3912345	实验组	55	男	24	5	低剂量（管电流降 30%）	70%ASIR-V	30.65	28.31	29.82	2.71	2.78	2.85	4.24	4.35	4.25	4.15	-	-	-	否	否
50	10712481	实验组	60	女	24.6	5	低剂量（管电流降 30%）	DLIR-M	37.24	33.85	35.92	3.83	3.9	3.97	4.87	4.85	4.87	4.88	-	-	-	是	是
51	10823592	对照组	55	男	24.5	5	-	-	-	-	-	-	-	-	-	-	-	-	低信号	高信号	低信号（无弥散受限）	是	是
52	4123456	对照组	44	女	21.9	5	-	-	-	-	-	-	-	-	-	-	-	-	等信号	等信号	等信号	否	否
53	10934613	对照组	66	男	25.7	5	-	-	-	-	-	-	-	-	-	-	-	-	低信号	高信号	低信号（无弥散受限）	是	是
54	4234567	对照组	38	女	22.7	5	-	-	-	-	-	-	-	-	-	-	-	-	等信号	等信号	等信号	否	否
55	10157924	对照组	58	男	23.6	5	-	-	-	-	-	-	-	-	-	-	-	-	低信号	高信号	低信号（无弥散受限）	是	是
56	4345678	对照组	51	男	24.1	5	-	-	-	-	-	-	-	-	-	-	-	-	等信号	等信号	等信号	否	否
57	10268135	对照组	45	女	21.5	5	-	-	-	-	-	-	-	-	-	-	-	-	低信号	高信号	低信号（无弥散受限）	是	是
58	4456789	对照组	67	男	25.9	5	-	-	-	-	-	-	-	-	-	-	-	-	等信号	等信号	等信号	否	否
59	10379246	对照组	37	女	22.9	5	-	-	-	-	-	-	-	-	-	-	-	-	低信号	高信号	低信号（无弥散受限）	是	是
60	4567891	对照组	59	男	23.4	5	-	-	-	-	-	-	-	-	-	-	-	-	等信号	等信号	等信号	否	否
61	10481357	对照组	53	男	24.6	5	-	-	-	-	-	-	-	-	-	-	-	-	低信号	高信号	低信号（无弥散受限）	是	是
62	4678912	对照组	46	女	22	5	-	-	-	-	-	-	-	-	-	-	-	-	等信号	等信号	等信号	否	否
63	10592468	对照组	64	男	25.8	5	-	-	-	-	-	-	-	-	-	-	-	-	低信号	高信号	低信号（无弥散受限）	是	是
64	4789123	对照组	39	女	23	5	-	-	-	-	-	-	-	-	-	-	-	-	等信号	等信号	等信号	否	否
65	10613579	对照组	57	男	23.7	5	-	-	-	-	-	-	-	-	-	-	-	-	低信号	高信号	低信号（无弥散受限）	是	是
66	4891234	对照组	48	女	21.6	5	-	-	-	-	-	-	-	-	-	-	-	-	等信号	等信号	等信号	否	否
67	10724681	对照组	61	男	24.3	5	-	-	-	-	-	-	-	-	-	-	-	-	低信号	高信号	低信号（无弥散受限）	是	是
68	4912345	对照组	42	女	22.5	5	-	-	-	-	-	-	-	-	-	-	-	-	等信号	等信号	等信号	否	否
69	10835792	对照组	59	男	25	5	-	-	-	-	-	-	-	-	-	-	-	-	低信号	高信号	低信号（无弥散受限）	是	是
70	5123456	对照组	45	女	21.8	5	-	-	-	-	-	-	-	-	-	-	-	-	等信号	等信号	等信号	否	否
71	10946813	对照组	66	男	25.5	5	-	-	-	-	-	-	-	-	-	-	-	-	低信号	高信号	低信号（无弥散受限）	是	是
72	5234567	对照组	40	女	22.3	5	-	-	-	-	-	-	-	-	-	-	-	-	等信号	等信号	等信号	否	否
73	10168924	对照组	55	男	23.9	5	-	-	-	-	-	-	-	-	-	-	-	-	低信号	高信号	低信号（无弥散受限）	是	是
74	5345678	对照组	47	女	21.4	5	-	-	-	-	-	-	-	-	-	-	-	-	等信号	等信号	等信号	否	否
75	10279135	对照组	63	男	24.8	5	-	-	-	-	-	-	-	-	-	-	-	-	低信号	高信号	低信号（无弥散受限）	是	是
76	5456789	对照组	43	女	22.7	5	-	-	-	-	-	-	-	-	-	-	-	-	等信号	等信号	等信号	否	否
77	10389246	对照组	52	男	23.3	5	-	-	-	-	-	-	-	-	-	-	-	-	低信号	高信号	低信号（无弥散受限）	是	是
78	5567891	对照组	49	女	21.9	5	-	-	-	-	-	-	-	-	-	-	-	-	等信号	等信号	等信号	否	否
79	10491357	对照组	60	男	24.5	5	-	-	-	-	-	-	-	-	-	-	-	-	低信号	高信号	低信号（无弥散受限）	是	是
80	5678912	对照组	41	女	22.1	5	-	-	-	-	-	-	-	-	-	-	-	-	等信号	等信号	等信号	否	否
81	10179248	对照组	54	男	23.8	5	-	-	-	-	-	-	-	-	-	-	-	-	低信号	高信号	低信号（无弥散受限）	是	是
82	5789123	对照组	44	女	21.5	5	-	-	-	-	-	-	-	-	-	-	-	-	等信号	等信号	等信号	否	否
83	10289359	对照组	62	男	24.9	5	-	-	-	-	-	-	-	-	-	-	-	-	低信号	高信号	低信号（无弥散受限）	是	是
84	5891234	对照组	38	女	22.8	5	-	-	-	-	-	-	-	-	-	-	-	-	等信号	等信号	等信号	否	否
85	10391467	对照组	56	男	23.5	5	-	-	-	-	-	-	-	-	-	-	-	-	低信号	高信号	低信号（无弥散受限）	是	是
86	5912345	对照组	47	女	21.7	5	-	-	-	-	-	-	-	-	-	-	-	-	等信号	等信号	等信号	否	否
87	10412578	对照组	65	男	25.2	5	-	-	-	-	-	-	-	-	-	-	-	-	低信号	高信号	低信号（无弥散受限）	是	是
88	6123456	对照组	40	女	22.4	5	-	-	-	-	-	-	-	-	-	-	-	-	等信号	等信号	等信号	否	否
89	10523689	对照组	51	男	23.2	5	-	-	-	-	-	-	-	-	-	-	-	-	低信号	高信号	低信号（无弥散受限）	是	是
90	6234567	对照组	45	女	21.3	5	-	-	-	-	-	-	-	-	-	-	-	-	等信号	等信号	等信号	否	否
91	10634791	对照组	67	男	25.6	5	-	-	-	-	-	-	-	-	-	-	-	-	低信号	高信号	低信号（无弥散受限）	是	是
92	6345678	对照组	37	女	22.6	5	-	-	-	-	-	-	-	-	-	-	-	-	等信号	等信号	等信号	否	否
93	10745812	对照组	58	男	24.1	5	-	-	-	-	-	-	-	-	-	-	-	-	低信号	高信号	低信号（无弥散受限）	是	是
94	6456789	对照组	42	女	21.8	5	-	-	-	-	-	-	-	-	-	-	-	-	等信号	等信号	等信号	否	否
95	10856923	对照组	64	男	24.7	5	-	-	-	-	-	-	-	-	-	-	-	-	低信号	高信号	低信号（无弥散受限）	是	是
96	6567891	对照组	43	女	22.2	5	-	-	-	-	-	-	-	-	-	-	-	-	等信号	等信号	等信号	否	否
97	10967134	对照组	53	男	23.6	5	-	-	-	-	-	-	-	-	-	-	-	-	低信号	高信号	低信号（无弥散受限）	是	是
98	6678912	对照组	48	女	21.6	5	-	-	-	-	-	-	-	-	-	-	-	-	等信号	等信号	等信号	否	否
99	10178245	对照组	61	男	24.4	5	-	-	-	-	-	-	-	-	-	-	-	-	低信号	高信号	低信号（无弥散受限）	是	是
100	6789123	对照组	41	女	22	5	-	-	-	-	-	-	-	-	-	-	-	-	等信号	等信号	等信号	否	否
